# Supplementary material
Source: MDPI journal article supplement (https://www.mdpi.com/2218-2004/11/11/138)
Supplement: s1 [file s1]

Structure, coordinates and energies of various species under investigation.

Supplementary material for "Fragmentation of multiply charged  $C_{10}H_8$  isomers produced in keV range proton collision" by Vinitha M. V. *et al.*

I.  $C_{10}H_8$  parent di and trication isomers (coordinates in a.u. and energies in hartree):

1) Naphthalene dication:

|                                                                                   |   |          |          |          |                     |
|-----------------------------------------------------------------------------------|---|----------|----------|----------|---------------------|
| 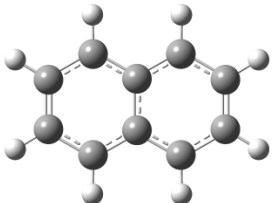 | C | -5.3974  | -0.04555 | 0.000337 | Energy: -385.132119 |
|                                                                                   | C | -3.95737 | -0.03335 | 0.000137 |                     |
|                                                                                   | C | -3.24324 | 1.183423 | 0.000241 |                     |
|                                                                                   | C | -3.96716 | 2.419757 | 0.000511 |                     |
|                                                                                   | C | -5.3777  | 2.39242  | 0.000684 |                     |
|                                                                                   | C | -6.09304 | 1.14251  | 0.000608 |                     |
|                                                                                   | H | -1.26824 | 0.279451 | -0.00014 |                     |
|                                                                                   | H | -5.91913 | -0.99894 | 0.000259 |                     |
|                                                                                   | H | -3.42137 | -0.98133 | -5.9E-05 |                     |
|                                                                                   | C | -1.83271 | 1.21076  | 0.000078 |                     |
|                                                                                   | C | -3.25303 | 3.63653  | 0.000603 |                     |
|                                                                                   | H | -5.94217 | 3.323729 | 0.000916 |                     |
|                                                                                   | H | -7.17979 | 1.154096 | 0.000751 |                     |
|                                                                                   | C | -1.81301 | 3.648736 | 0.000414 |                     |
|                                                                                   | C | -1.11737 | 2.460672 | 0.000144 |                     |
|                                                                                   | H | -3.78904 | 4.58451  | 0.000824 |                     |
|                                                                                   | H | -1.29128 | 4.602121 | 0.000496 |                     |
|                                                                                   | H | -0.03062 | 2.449089 | -0.00001 |                     |

2) Azulene dication:

|                                                                                     |   |          |          |          |                     |
|-------------------------------------------------------------------------------------|---|----------|----------|----------|---------------------|
| 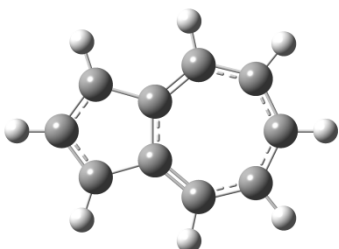 | C | 3.393954 | -4.66344 | 0.000257 | Energy: -385.117838 |
|                                                                                     | C | 4.795856 | -4.65366 | -0.00034 |                     |
|                                                                                     | C | 5.690108 | -3.54391 | -0.00034 |                     |
|                                                                                     | C | 2.509076 | -3.57634 | 0.001055 |                     |
|                                                                                     | C | 5.337811 | -2.21045 | 0.000315 |                     |
|                                                                                     | C | 2.795992 | -2.18006 | 0.001489 |                     |
|                                                                                     | C | 4.048648 | -1.60286 | 0.001142 |                     |
|                                                                                     | H | 2.930414 | -5.64776 | 0.000081 |                     |
|                                                                                     | H | 5.274099 | -5.63194 | -0.0009  |                     |
|                                                                                     | H | 6.750721 | -3.78887 | -0.00092 |                     |
|                                                                                     | H | 1.45006  | -3.82975 | 0.001413 |                     |
|                                                                                     | H | 1.931799 | -1.51817 | 0.002149 |                     |
|                                                                                     | C | 6.321845 | -1.0841  | 0.000281 |                     |
|                                                                                     | H | 7.401765 | -1.22307 | -0.00025 |                     |
|                                                                                     | C | 5.65871  | 0.141558 | 0.001069 |                     |
|                                                                                     | H | 6.121125 | 1.122521 | 0.001245 |                     |
|                                                                                     | C | 4.291046 | -0.1271  | 0.001588 |                     |
|                                                                                     | H | 3.49656  | 0.617441 | 0.002263 |                     |

3) Table S1a: Structure A dication:

|                                                                                     |   |          |          |          |                     |
|-------------------------------------------------------------------------------------|---|----------|----------|----------|---------------------|
| 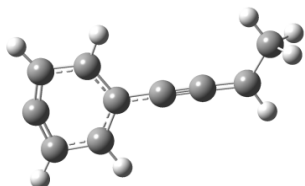 | C | 1.220908 | 1.230404 | -0.0237  | Energy: -385.019151 |
|                                                                                     | C | 0.635173 | -0.06166 | -0.01466 |                     |
|                                                                                     | C | 1.444424 | -1.22712 | -0.01571 |                     |
|                                                                                     | C | 2.86808  | -1.14444 | -0.02576 |                     |
|                                                                                     | C | 3.110237 | 0.162534 | -0.03258 |                     |
|                                                                                     | C | 2.635899 | 1.404569 | -0.03424 |                     |
|                                                                                     | H | 0.618642 | 2.136964 | -0.0231  |                     |
|                                                                                     | H | 1.015167 | -2.22742 | -0.00886 |                     |
|                                                                                     | H | 3.54311  | -1.99785 | -0.02707 |                     |
|                                                                                     | H | 3.147185 | 2.364998 | -0.0416  |                     |
|                                                                                     |   |          |          |          |                     |

|  |   |          |          |          |  |
|--|---|----------|----------|----------|--|
|  | C | -0.77317 | -0.19343 | -0.00448 |  |
|  | C | -1.9987  | -0.31476 | 0.00451  |  |
|  | C | -3.3554  | -0.48718 | 0.014591 |  |
|  | H | -3.71453 | -1.52115 | 0.021195 |  |
|  | C | -4.35202 | 0.57805  | 0.017341 |  |
|  | H | -5.03527 | 0.414469 | -0.83905 |  |
|  | H | -3.94891 | 1.589759 | 0.010319 |  |
|  | H | -5.0227  | 0.421556 | 0.884953 |  |

4) Table S1b: Structure B dication:

|                                                                                   |   |          |          |          |                     |
|-----------------------------------------------------------------------------------|---|----------|----------|----------|---------------------|
| 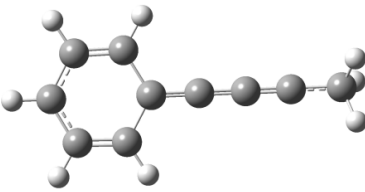 | C | 1.520733 | -0.46004 | -0.66175 | Energy: -385.060797 |
|                                                                                   | C | 0.51484  | -1.31065 | -0.02629 |                     |
|                                                                                   | C | 0.885278 | -2.60247 | 0.551018 |                     |
|                                                                                   | C | 2.196875 | -2.99431 | 0.482111 |                     |
|                                                                                   | C | 3.159285 | -2.15764 | -0.13685 |                     |
|                                                                                   | C | 2.817066 | -0.90353 | -0.70191 |                     |
|                                                                                   | H | 1.22708  | 0.494956 | -1.0843  |                     |
|                                                                                   | H | 0.125025 | -3.21976 | 1.017701 |                     |
|                                                                                   | H | 2.499969 | -3.94869 | 0.903011 |                     |
|                                                                                   | H | 3.584558 | -0.29218 | -1.16791 |                     |
|                                                                                   | C | -0.7546  | -0.90294 | 0.028155 |                     |
|                                                                                   | C | -1.98029 | -0.5081  | 0.081345 |                     |
|                                                                                   | C | -3.17458 | -0.12005 | 0.134384 |                     |
|                                                                                   | C | -4.51506 | 0.306902 | 0.188192 |                     |
|                                                                                   | H | -4.70571 | 0.9851   | 1.035097 |                     |
|                                                                                   | H | -4.79695 | 0.791647 | -0.76781 |                     |
|                                                                                   | H | -5.17162 | -0.58508 | 0.277118 |                     |
|                                                                                   | H | 4.194565 | -2.4888  | -0.17938 |                     |

5) Naphthalene trication:

|                                                                                     |   |          |          |          |                     |
|-------------------------------------------------------------------------------------|---|----------|----------|----------|---------------------|
| 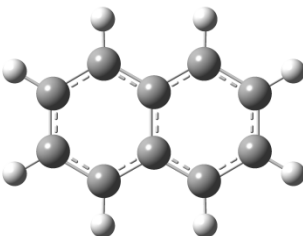 | C | -6.05914 | -0.53835 | 0.000325 | Energy: -384.441350 |
|                                                                                     | C | -4.61326 | -0.5364  | 0.000144 |                     |
|                                                                                     | C | -3.90151 | 0.686997 | 0.00024  |                     |
|                                                                                     | C | -4.65097 | 1.966927 | 0.000524 |                     |
|                                                                                     | C | -6.06616 | 1.94488  | 0.000698 |                     |
|                                                                                     | C | -6.7754  | 0.684886 | 0.000607 |                     |
|                                                                                     | H | -1.91131 | -0.2202  | -0.00014 |                     |
|                                                                                     | H | -6.59723 | -1.48987 | 0.000234 |                     |
|                                                                                     | H | -4.08425 | -1.49256 | -4.9E-05 |                     |
|                                                                                     | C | -2.4863  | 0.709043 | 0.000066 |                     |
|                                                                                     | C | -3.93921 | 3.190319 | 0.000621 |                     |
|                                                                                     | H | -6.64117 | 2.874112 | 0.00093  |                     |
|                                                                                     | H | -7.86853 | 0.681261 | 0.000744 |                     |
|                                                                                     | C | -2.49333 | 3.192259 | 0.000413 |                     |
|                                                                                     | C | -1.77707 | 1.969024 | 0.000134 |                     |
|                                                                                     | H | -4.46822 | 4.146485 | 0.000842 |                     |
|                                                                                     | H | -1.95524 | 4.143785 | 0.00048  |                     |
|                                                                                     | H | -0.68394 | 1.972653 | -2.4E-05 |                     |

6) Azulene trication:

|  |   |          |          |        |  |
|--|---|----------|----------|--------|--|
|  | C | 3.394514 | -4.66233 | 0.0002 |  |
|--|---|----------|----------|--------|--|

|                                                                                   |   |          |          |          |                         |
|-----------------------------------------------------------------------------------|---|----------|----------|----------|-------------------------|
| 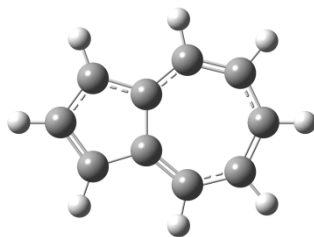 | C | 4.823014 | -4.66323 | -0.00031 | Energy: -<br>384.430155 |
|                                                                                   | C | 5.722622 | -3.55732 | -0.00035 |                         |
|                                                                                   | C | 2.484547 | -3.56145 | 0.001053 |                         |
|                                                                                   | C | 5.367459 | -2.20172 | 0.000296 |                         |
|                                                                                   | C | 2.765021 | -2.16363 | 0.001552 |                         |
|                                                                                   | C | 4.036611 | -1.57459 | 0.001183 |                         |
|                                                                                   | H | 2.928734 | -5.65137 | -0.00007 |                         |
|                                                                                   | H | 5.289836 | -5.65193 | -0.00079 |                         |
|                                                                                   | H | 6.78636  | -3.80505 | -0.00092 |                         |
|                                                                                   | H | 1.424785 | -3.83042 | 0.001389 |                         |
|                                                                                   | H | 1.896858 | -1.50091 | 0.002247 |                         |
|                                                                                   | C | 6.343435 | -1.11474 | 0.000244 |                         |
|                                                                                   | H | 7.430456 | -1.23769 | -0.00032 |                         |
|                                                                                   | C | 5.659752 | 0.144191 | 0.001042 |                         |
|                                                                                   | H | 6.125372 | 1.132141 | 0.001174 |                         |
|                                                                                   | C | 4.253548 | -0.12996 | 0.001629 |                         |
|                                                                                   | H | 3.466666 | 0.630009 | 0.002333 |                         |

7) Table S1c: Structure A trication:

|                                                                                     |   |          |          |          |                         |
|-------------------------------------------------------------------------------------|---|----------|----------|----------|-------------------------|
| 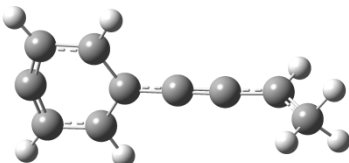 | C | 1.36369  | 1.243737 | 0.43447  | Energy: -<br>384.360372 |
|                                                                                     | C | 0.645453 | 0.030108 | 0.074214 |                         |
|                                                                                     | C | 1.355349 | -1.14871 | -0.4001  |                         |
|                                                                                     | C | 2.765632 | -1.1377  | -0.52167 |                         |
|                                                                                     | C | 3.118409 | 0.090797 | -0.12442 |                         |
|                                                                                     | C | 2.77413  | 1.302038 | 0.32924  |                         |
|                                                                                     | H | 0.849477 | 2.137534 | 0.793573 |                         |
|                                                                                     | H | 0.834822 | -2.06875 | -0.67364 |                         |
|                                                                                     | H | 3.377621 | -1.97904 | -0.86899 |                         |
|                                                                                     | H | 3.392068 | 2.173041 | 0.5793   |                         |
|                                                                                     | C | -0.73984 | -0.00702 | 0.194607 |                         |
|                                                                                     | C | -1.98512 | -0.04154 | 0.306511 |                         |
|                                                                                     | C | -3.36737 | -0.10673 | 0.507374 |                         |
|                                                                                     | H | -3.66799 | -0.45573 | 1.511106 |                         |
|                                                                                     | C | -4.38835 | 0.227734 | -0.43999 |                         |
|                                                                                     | H | -5.10603 | -0.63837 | -0.48037 |                         |
|                                                                                     | H | -4.08387 | 0.571047 | -1.42799 |                         |
|                                                                                     | H | -5.09997 | 0.93585  | 0.06888  |                         |

8) Table S1d: Structure B trication:

|                                                                                     |   |          |          |          |
|-------------------------------------------------------------------------------------|---|----------|----------|----------|
| 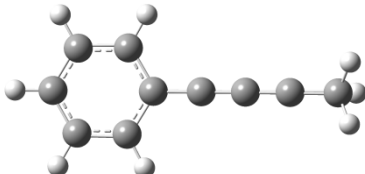 | C | 1.504019 | -0.48621 | -0.64982 |
|                                                                                     | C | 0.495426 | -1.30605 | -0.02649 |
|                                                                                     | C | 0.886802 | -2.57262 | 0.539901 |
|                                                                                     | C | 2.262888 | -2.99177 | 0.474098 |
|                                                                                     | C | 3.239767 | -2.18164 | -0.13801 |
|                                                                                     | C | 2.869353 | -0.94197 | -0.69593 |
|                                                                                     | H | 1.249421 | 0.478382 | -1.08896 |
|                                                                                     | H | 0.154625 | -3.22184 | 1.020017 |
|                                                                                     | H | 2.532668 | -3.95473 | 0.910624 |
|                                                                                     | H | 3.613011 | -0.30281 | -1.17454 |
|                                                                                     | C | -0.81406 | -0.88728 | 0.027802 |
|                                                                                     | C | -2.02153 | -0.49975 | 0.079209 |
|                                                                                     | C | -3.24044 | -0.10484 | 0.134483 |
|                                                                                     | C | -4.55177 | 0.318039 | 0.192621 |
|                                                                                     | H | -4.75771 | 0.968981 | 1.073226 |
|                                                                                     | H | -4.83395 | 0.855141 | -0.75274 |
|                                                                                     | H | -5.23967 | -0.572   | 0.226435 |

Energy: -384.399503

|  |   |          |          |       |  |
|--|---|----------|----------|-------|--|
|  | H | 4.277626 | -2.51265 | -0.18 |  |
|--|---|----------|----------|-------|--|

II. C<sub>9</sub>H<sub>5</sub> mono and di-cation isomers (coordinates in a.u. and energies in hartree):

1) Table S2a: structure A monocation:

|                                                                                   |   |          |          |          |                     |
|-----------------------------------------------------------------------------------|---|----------|----------|----------|---------------------|
| 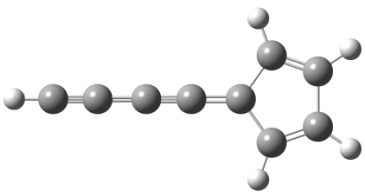 | C | 1.57314  | -1.20183 | 0.000064 | Energy: -345.518991 |
|                                                                                   | H | 1.202599 | -2.22335 | 0.000095 |                     |
|                                                                                   | C | 2.84981  | -0.76153 | 0.000078 |                     |
|                                                                                   | H | 3.751998 | -1.37322 | 0.000122 |                     |
|                                                                                   | C | 1.573056 | 1.201852 | 0.000095 |                     |
|                                                                                   | H | 1.202445 | 2.223345 | 0.000154 |                     |
|                                                                                   | C | 2.849757 | 0.761644 | 0.000097 |                     |
|                                                                                   | H | 3.751903 | 1.373394 | 0.000162 |                     |
|                                                                                   | C | 0.719268 | -1.8E-05 | -0.0001  |                     |
|                                                                                   | C | -0.64502 | -6.7E-05 | -6.2E-05 |                     |
|                                                                                   | C | -1.88878 | -8.8E-05 | -3.2E-05 |                     |
|                                                                                   | C | -3.23233 | -5.1E-05 | 0.000084 |                     |
|                                                                                   | C | -4.45841 | 0.000005 | 0.000186 |                     |
|                                                                                   | H | -5.5373  | 0.000087 | 0.000311 |                     |

2) Table S2b: structure B monocation:

|                                                                                     |   |          |          |          |                     |
|-------------------------------------------------------------------------------------|---|----------|----------|----------|---------------------|
| 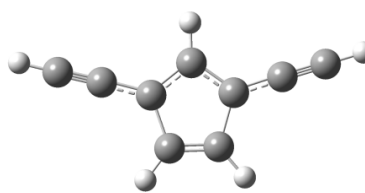 | C | 0.000005 | -0.84652 | 0.000142 | Energy: -345.511259 |
|                                                                                     | C | 1.123878 | -0.00633 | 0.000078 |                     |
|                                                                                     | C | 0.668826 | 1.441741 | -0.00022 |                     |
|                                                                                     | H | 1.351532 | 2.288526 | -0.00038 |                     |
|                                                                                     | C | -1.12388 | -0.00634 | 0.000068 |                     |
|                                                                                     | C | -0.66884 | 1.441735 | -0.0002  |                     |
|                                                                                     | H | -1.35155 | 2.288513 | -0.00036 |                     |
|                                                                                     | C | -2.45617 | -0.39343 | 0.000103 |                     |
|                                                                                     | C | -3.64058 | -0.70259 | 0.000129 |                     |
|                                                                                     | H | -4.68197 | -0.9839  | 0.000141 |                     |
|                                                                                     | C | 2.456177 | -0.39341 | 0.000095 |                     |
|                                                                                     | C | 3.640592 | -0.70255 | 0.000103 |                     |
|                                                                                     | H | 4.681984 | -0.98384 | 0.000101 |                     |
|                                                                                     | H | 0.00001  | -1.93267 | 0.000264 |                     |

3) Table S2c: structure C monocation:

|                                                                                     |   |          |          |          |                     |
|-------------------------------------------------------------------------------------|---|----------|----------|----------|---------------------|
| 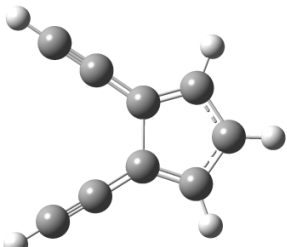 | C | 2.317386 | -1.7E-05 | -0.0001  | Energy: -345.503234 |
|                                                                                     | C | 1.519074 | 1.1849   | -0.00017 |                     |
|                                                                                     | H | 1.889934 | 2.206634 | -0.00024 |                     |
|                                                                                     | C | 1.519083 | -1.18494 | 0.000005 |                     |
|                                                                                     | H | 1.889952 | -2.20667 | 0.000049 |                     |
|                                                                                     | C | 0.202072 | -0.79133 | 0.000142 |                     |
|                                                                                     | C | 0.202066 | 0.791278 | -0.00021 |                     |
|                                                                                     | C | -0.95699 | 1.550515 | -0.00023 |                     |
|                                                                                     | C | -1.99463 | 2.199575 | -0.00022 |                     |
|                                                                                     | H | -2.90055 | 2.783918 | 0.000013 |                     |
|                                                                                     | C | -0.95698 | -1.55057 | 0.000226 |                     |
|                                                                                     | C | -1.99463 | -2.19961 | 0.000272 |                     |
|                                                                                     | H | -2.90072 | -2.7837  | 0.000645 |                     |
|                                                                                     | H | 3.410351 | -1.3E-05 | -0.00015 |                     |

4) Table S2d: structure D monocation:

|                                                                                   |   |          |          |          |                         |
|-----------------------------------------------------------------------------------|---|----------|----------|----------|-------------------------|
| 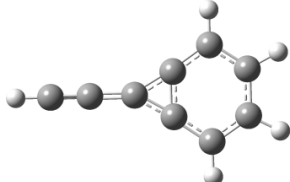 | C | 2.31433  | -0.72312 | -2.6E-05 | Energy: -<br>345.552081 |
|                                                                                   | C | 2.314333 | 0.7231   | -4.1E-05 |                         |
|                                                                                   | C | 1.162447 | 1.496036 | -4.2E-05 |                         |
|                                                                                   | C | 0.003625 | 0.700253 | -4.8E-05 |                         |
|                                                                                   | C | 0.003622 | -0.70026 | -3.2E-05 |                         |
|                                                                                   | C | 1.162441 | -1.49605 | -9E-06   |                         |
|                                                                                   | H | 3.287094 | -1.22113 | -0.00002 |                         |
|                                                                                   | H | 3.287099 | 1.221106 | -4.4E-05 |                         |
|                                                                                   | H | 1.171725 | 2.585818 | -4.4E-05 |                         |
|                                                                                   | H | 1.171713 | -2.58583 | 0.000014 |                         |
|                                                                                   | C | -1.19753 | 0        | -7.5E-05 |                         |
|                                                                                   | C | -2.58312 | 0        | 0.000009 |                         |
|                                                                                   | C | -3.80014 | 0.000005 | 0.000084 |                         |
|                                                                                   | H | -4.87847 | -1.1E-05 | 0.000115 |                         |

5) Table S2e: structure E monocation:

|                                                                                    |   |          |          |          |
|------------------------------------------------------------------------------------|---|----------|----------|----------|
| 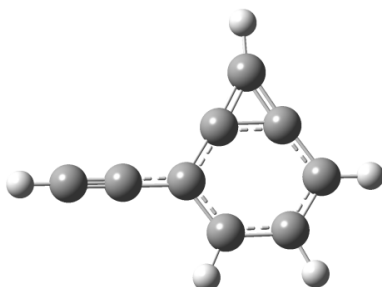 | C | 1.349993 | -1.51414 | -0.00013 |
|                                                                                    | C | -0.08478 | -1.38795 | -0.00011 |
|                                                                                    | C | -0.76896 | -0.16475 | -1.8E-05 |
|                                                                                    | C | 1.554179 | 0.78385  | 0.000119 |
|                                                                                    | C | 2.235688 | -0.44233 | -4.3E-05 |
|                                                                                    | H | 1.751762 | -2.53085 | -0.00024 |
|                                                                                    | H | -0.67147 | -2.30909 | -0.00021 |
|                                                                                    | H | 3.31922  | -0.55757 | -8.2E-05 |
|                                                                                    | C | -2.17656 | -0.02215 | -2.3E-05 |
|                                                                                    | H | -4.45483 | 0.221888 | -0.0001  |
|                                                                                    | C | 0.149915 | 0.919437 | 0.000134 |
|                                                                                    | C | 0.955878 | 2.025092 | 0.000331 |
|                                                                                    | C | -3.38428 | 0.10936  | -2.9E-05 |
|                                                                                    | H | 1.052977 | 3.113982 | 0.00027  |

Energy: -345.542245

6) Table S2f: structure F monocation:

|                                                                                     |   |          |          |          |                         |
|-------------------------------------------------------------------------------------|---|----------|----------|----------|-------------------------|
| 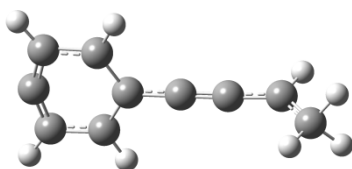 | C | -0.24381 | 1.285262 | -6.7E-05 | Energy: -<br>345.544013 |
|                                                                                     | C | -0.84587 | -0.05551 | -0.00022 |                         |
|                                                                                     | C | -0.07086 | -1.22463 | -0.00026 |                         |
|                                                                                     | C | 1.868341 | 0.340272 | -3.5E-05 |                         |
|                                                                                     | C | 1.112205 | 1.531955 | -2E-06   |                         |
|                                                                                     | H | -0.94292 | 2.124659 | 0.000103 |                         |
|                                                                                     | H | 1.533792 | 2.537454 | 0.000086 |                         |
|                                                                                     | C | 1.299414 | -0.95222 | -0.00016 |                         |
|                                                                                     | C | 2.666548 | -0.77118 | 0.000095 |                         |
|                                                                                     | H | 3.669485 | -1.20516 | 0.000448 |                         |
|                                                                                     | H | -0.51393 | -2.21982 | -0.00036 |                         |
|                                                                                     | C | -3.476   | -0.17056 | 0.000141 |                         |
|                                                                                     | H | -4.55182 | -0.21564 | 0.000265 |                         |
|                                                                                     | C | -2.2611  | -0.12639 | -2.3E-05 |                         |

7) Table S2g: structure G monocation:

|  |   |          |          |          |                         |
|--|---|----------|----------|----------|-------------------------|
|  | C | -5.16535 | -0.00712 | -3.9E-05 | Energy: -<br>345.495600 |
|  | H | -5.56179 | -0.50477 | -0.90071 |                         |
|  | H | -5.56192 | -0.5018  | 0.902199 |                         |
|  | H | -5.52363 | 1.03883  | -0.00186 |                         |
|  | C | -3.72622 | -0.01187 | -1.5E-05 |                         |
|  | C | -2.49141 | -0.00833 | -3.5E-05 |                         |

|                                                                                   |   |          |          |          |  |
|-----------------------------------------------------------------------------------|---|----------|----------|----------|--|
| 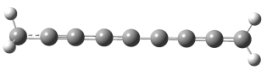 | C | -1.15966 | -0.00615 | -2.1E-05 |  |
|                                                                                   | C | 0.093094 | -0.00422 | 0.000068 |  |
|                                                                                   | C | 1.404486 | -0.0022  | 0.000132 |  |
|                                                                                   | C | 2.670967 | -0.00015 | -5E-06   |  |
|                                                                                   | C | 3.967233 | 0.001864 | -8.6E-05 |  |
|                                                                                   | C | 5.273575 | 0.003737 | -0.00017 |  |
|                                                                                   | H | 5.83706  | -0.93763 | -0.00017 |  |
|                                                                                   | H | 5.834353 | 0.94672  | -0.00017 |  |
|                                                                                   |   |          |          |          |  |
|                                                                                   |   |          |          |          |  |

8) Table S2h: structure A dication:

|                                                                                   |   |          |          |          |                         |
|-----------------------------------------------------------------------------------|---|----------|----------|----------|-------------------------|
| 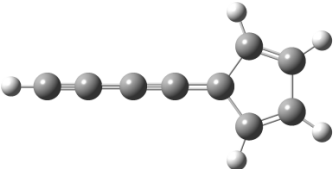 | C | 1.566494 | -1.18177 | 0.000107 | Energy: -<br>345.045920 |
|                                                                                   | H | 1.232955 | -2.22217 | 0.000136 |                         |
|                                                                                   | C | 2.893055 | -0.71946 | 0.000025 |                         |
|                                                                                   | H | 3.785305 | -1.35193 | -2.9E-05 |                         |
|                                                                                   | C | 1.566164 | 1.181644 | 0.000076 |                         |
|                                                                                   | H | 1.232335 | 2.221957 | 0.000079 |                         |
|                                                                                   | C | 2.892855 | 0.719713 | 0.000007 |                         |
|                                                                                   | H | 3.784929 | 1.352425 | -6.3E-05 |                         |
|                                                                                   | C | 0.681179 | -0.00019 | 0.000177 |                         |
|                                                                                   | C | -0.66726 | -0.00038 | 0.000248 |                         |
|                                                                                   | C | -1.92794 | -0.00041 | 0.000309 |                         |
|                                                                                   | C | -3.254   | -6.3E-05 | 0.000189 |                         |
|                                                                                   | C | -4.49303 | 0.000246 | 0.000073 |                         |
|                                                                                   | H | -5.5809  | 0.000545 | -8.3E-05 |                         |

9) Table S2i: structure B dication:

|                                                                                     |   |          |          |          |                         |
|-------------------------------------------------------------------------------------|---|----------|----------|----------|-------------------------|
| 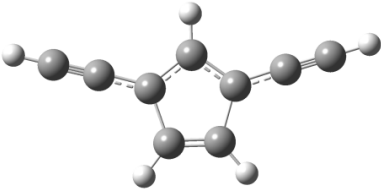 | C | -2E-06   | -0.82321 | 0.000008 | Energy: -<br>345.029230 |
|                                                                                     | C | 1.162157 | 0.033904 | 0.000002 |                         |
|                                                                                     | C | 0.690743 | 1.431434 | 0.000019 |                         |
|                                                                                     | H | 1.343629 | 2.307757 | 0.000024 |                         |
|                                                                                     | C | -1.16216 | 0.033906 | 0.000014 |                         |
|                                                                                     | C | -0.69074 | 1.431435 | 0.000016 |                         |
|                                                                                     | H | -1.34363 | 2.30776  | 0.000022 |                         |
|                                                                                     | C | -2.47292 | -0.37413 | 0.000013 |                         |
|                                                                                     | C | -3.65512 | -0.72933 | 0.000011 |                         |
|                                                                                     | H | -4.69629 | -1.04412 | 0.000062 |                         |
|                                                                                     | C | 2.472914 | -0.37414 | 0.000005 |                         |
|                                                                                     | C | 3.655116 | -0.72933 | 0.000008 |                         |
|                                                                                     | H | 4.696287 | -1.04411 | 0.000032 |                         |
|                                                                                     | H | -3E-06   | -1.91526 | 0.000005 |                         |

10) Table S2j: structure C dication:

|  |   |           |           |          |                         |
|--|---|-----------|-----------|----------|-------------------------|
|  | C | -2.315491 | -0.000336 | 0.000437 | Energy: -<br>345.026773 |
|  | C | -1.502083 | 1.170233  | 0.000351 |                         |
|  | H | -1.857357 | 2.203059  | 0.00034  |                         |
|  | C | -1.501731 | -1.170665 | 0.000365 |                         |
|  | H | -1.856699 | -2.203596 | 0.000381 |                         |

|                                                                                   |   |           |           |           |  |
|-----------------------------------------------------------------------------------|---|-----------|-----------|-----------|--|
| 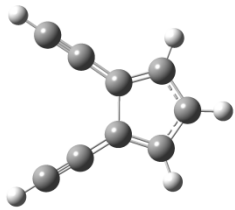 | C | -0.13956  | -0.76787  | 0.000177  |  |
|                                                                                   | C | -0.13979  | 0.767845  | 0.000378  |  |
|                                                                                   | C | 0.968498  | 1.570416  | 0.000209  |  |
|                                                                                   | C | 1.951272  | 2.32011   | 0.000073  |  |
|                                                                                   | H | 2.812379  | 2.984894  | -0.000066 |  |
|                                                                                   | C | 0.96897   | -1.570108 | 0.000082  |  |
|                                                                                   | C | 1.951965  | -2.319512 | -0.000009 |  |
|                                                                                   | H | 2.813263  | -2.984048 | -0.000064 |  |
|                                                                                   | H | -3.410007 | -0.000501 | 0.000501  |  |

11) Table S2k: structure D dication:

|                                                                                   |   |          |          |          |                         |
|-----------------------------------------------------------------------------------|---|----------|----------|----------|-------------------------|
| 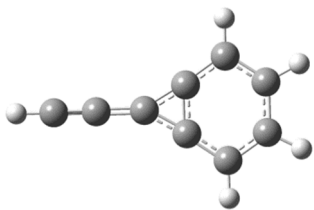 | C | -2.36614 | 0.706635 | 0.000002 | Energy: -<br>345.027791 |
|                                                                                   | C | -2.36622 | -0.70655 | -1.4E-05 |                         |
|                                                                                   | C | -1.17015 | -1.48959 | -2.9E-05 |                         |
|                                                                                   | C | 0.029237 | -0.68105 | -2.6E-05 |                         |
|                                                                                   | C | 0.02932  | 0.680839 | -1.1E-05 |                         |
|                                                                                   | C | -1.16996 | 1.489528 | 0.000004 |                         |
|                                                                                   | H | -3.32833 | 1.230417 | 0.000013 |                         |
|                                                                                   | H | -3.32848 | -1.23022 | -1.4E-05 |                         |
|                                                                                   | H | -1.17943 | -2.58522 | -0.00004 |                         |
|                                                                                   | H | -1.17911 | 2.58516  | 0.000018 |                         |
|                                                                                   | C | 1.265522 | -0.00018 | -3.9E-05 |                         |
|                                                                                   | C | 2.627305 | -0.00027 | -2.5E-05 |                         |
|                                                                                   | C | 3.853395 | -0.00031 | -8E-06   |                         |
|                                                                                   | H | 4.93962  | 0.00084  | 0.000261 |                         |

12) Table S2l: structure E dication:

|                                                                                     |   |          |          |          |                         |
|-------------------------------------------------------------------------------------|---|----------|----------|----------|-------------------------|
| 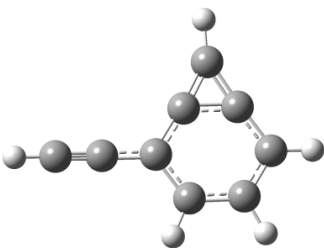 | C | -1.35914 | -1.51922 | 0.000215 | Energy: -<br>345.045245 |
|                                                                                     | C | 0.070845 | -1.39685 | 0.000135 |                         |
|                                                                                     | C | 0.766874 | -0.14664 | -0.00013 |                         |
|                                                                                     | C | -1.52242 | 0.822283 | -0.00015 |                         |
|                                                                                     | C | -2.22561 | -0.42731 | 0.000041 |                         |
|                                                                                     | H | -1.77507 | -2.5318  | 0.000391 |                         |
|                                                                                     | H | 0.663134 | -2.31813 | 0.000252 |                         |
|                                                                                     | H | -3.31536 | -0.52095 | 0.000062 |                         |
|                                                                                     | C | 2.150851 | -0.0445  | -0.00026 |                         |
|                                                                                     | H | 4.476134 | 0.121876 | 0.000661 |                         |
|                                                                                     | C | -0.14447 | 0.968833 | -0.00022 |                         |
|                                                                                     | C | -0.95919 | 2.081283 | 0.000058 |                         |
|                                                                                     | C | 3.390203 | 0.045285 | -0.00035 |                         |
|                                                                                     | H | -1.06924 | 3.173456 | -0.00034 |                         |

13) Table S2m: structure F dication:

|                                                                                     |   |          |          |          |                         |
|-------------------------------------------------------------------------------------|---|----------|----------|----------|-------------------------|
| 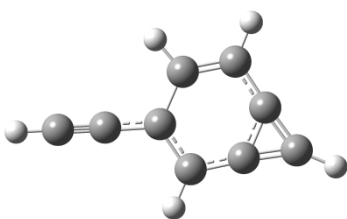 | C | -0.2488  | 1.328084 | 0.000084 | Energy: -<br>345.003401 |
|                                                                                     | C | -0.84366 | -0.01921 | 0.000031 |                         |
|                                                                                     | C | -0.0679  | -1.22573 | -1.3E-05 |                         |
|                                                                                     | C | 1.859226 | 0.345635 | 0.000063 |                         |
|                                                                                     | C | 1.110086 | 1.55773  | 0.000094 |                         |
|                                                                                     | H | -0.9432  | 2.17317  | 0.000116 |                         |
|                                                                                     | H | 1.549241 | 2.558212 | 0.000125 |                         |
|                                                                                     | C | 1.329037 | -0.9397  | 0.000017 |                         |
|                                                                                     | C | 2.692627 | -0.76652 | 0.000045 |                         |
|                                                                                     | H | 3.702953 | -1.1971  | 0.000067 |                         |
|                                                                                     | H | -0.51352 | -2.22497 | -7.2E-05 |                         |

|  |   |          |          |          |  |
|--|---|----------|----------|----------|--|
|  | C | -3.47464 | -0.25709 | 0.000027 |  |
|  | H | -4.55954 | -0.35584 | 0.000025 |  |
|  | C | -2.23666 | -0.14444 | 0.000029 |  |

14) Table S2n: structure G dication:

|                                                                                   |   |          |          |          |                         |
|-----------------------------------------------------------------------------------|---|----------|----------|----------|-------------------------|
| 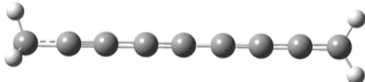 | C | 5.161271 | 0.006982 | -0.00029 | Energy: -<br>345.038617 |
|                                                                                   | H | 5.54622  | 0.527377 | -0.90317 |                         |
|                                                                                   | H | 5.546375 | 0.526428 | 0.903071 |                         |
|                                                                                   | H | 5.541417 | -1.03677 | -0.00087 |                         |
|                                                                                   | C | 3.748328 | 0.006654 | -0.0002  |                         |
|                                                                                   | C | 2.489683 | 0.005874 | -0.00025 |                         |
|                                                                                   | C | 1.187592 | 0.004799 | -0.00023 |                         |
|                                                                                   | C | -0.09335 | 0.003549 | -5.4E-05 |                         |
|                                                                                   | C | -1.37752 | 0.00212  | 0.000081 |                         |
|                                                                                   | C | -2.67041 | 0.000601 | -0.00015 |                         |
|                                                                                   | C | -3.94809 | -0.00086 | -0.00033 |                         |
|                                                                                   | C | -5.27559 | -0.00238 | -0.00052 |                         |
|                                                                                   | H | -5.84043 | 0.944744 | -0.00174 |                         |
|                                                                                   | H | -5.83824 | -0.95081 | 0.000545 |                         |
